# Supplementary material for: Influence of Tooth-Brushing on Early Healing after Access Flap Surgery: A Randomized Controlled Preliminary Study
Source: MDPI journal article supplement (doi:10.3390/ma14112933), 2021-05-29
Supplement: s1 [file s1]

Supplementary materials

# Influence of Tooth-Brushing on Early Healing after Access Flap Surgery: A Randomized Controlled Preliminary Study

Carlo Bertoldi <sup>1,\*</sup>, Luigi Generali <sup>1,\*</sup>, Pierpaolo Cortellini <sup>2</sup>, Michele Lalla <sup>3</sup>, Sofia Luppi <sup>4</sup>, Aldo Tomasi <sup>1</sup>, Davide Zaffe <sup>5,\*</sup>, Roberta Salvatori <sup>6</sup> and Stefania Bergamini <sup>1</sup>

<sup>1</sup> Department of Surgery, Medicine, Dentistry and Morphological Sciences with Transplant Surgery, Oncology and Regenerative Medicine Relevance, University of Modena and Reggio Emilia, 41124 Modena, Italy; aldo.tomasi@unimore.it (A.T.); stefania.bergamini@unimore.it (S.B.)

<sup>2</sup> The European Research Group on Periodontology (ERGOPerio), 3855 Brienzen - Bern, Switzerland; sandro@cortellini.org

<sup>3</sup> Department of Economics Marco Biagi, University of Modena and Reggio Emilia, 41121 Modena, Italy; michele.lalla@unimore.it

<sup>4</sup> Independent Researcher, 41124 Modena, Italy; sofialuppi@outlook.it

<sup>5</sup> Department of Biomedical, Metabolic and Neural Sciences, University of Modena and Reggio Emilia, 41125 Modena, Italy

<sup>6</sup> Biomaterials Laboratory, Department of Medical and Surgical Sciences of Children and Adults, University of Modena and Reggio Emilia, 41124 Modena, Italy; roberta.salvatori@unimore.it

\* Correspondence: carlo.bertoldi@unimore.it (C.B.); luigi.general@unimore.it (L.G.); davide.zaffe@unimore.it

**Table S1.** Groups A, B and C indices at baseline.

| A Group        | CL        | DR        | IA        | AP        | IF        | RG        | GI        | SC        | NM        | GC        |
|----------------|-----------|-----------|-----------|-----------|-----------|-----------|-----------|-----------|-----------|-----------|
| FMPS           | 19.2      | 15        | 13.4      | 17.3      | 15        | 14.9      | 16.6      | 23.1      | 13.5      | 18.7      |
| FMBS           | 8.7       | 14        | 11.6      | 9.6       | 12.5      | 5.5       | 3.2       | 7.4       | 13.5      | 12.5      |
| PPD            | 4         | 1         | 2         | 5         | 4         | 3         | 4         | 3         | 6         | 4         |
|                | 2         | 1         | 2         | 3         | 2         | 2         | 2         | 1         | 3         | 2         |
|                | 4         | 4         | 4         | 6         | 4         | 5         | 4         | 6         | 3         | 4         |
|                | 4         | 4         | 5         | 7         | 4         | 5         | 4         | 7         | 3         | 4         |
|                | 2         | 1         | 3         | 4         | 3         | 2         | 2         | 1         | 3         | 2         |
|                | 4         | 1         | 2         | 5         | 4         | 3         | 3         | 4         | 5         | 5         |
| REC            | 0         | 0         | 0         | 0         | 0         | 0         | 0         | 0         | 0         | 0         |
|                | 0         | 0         | 0         | 0         | 0         | 0         | 1         | 0         | 0         | 0         |
|                | 1         | 0         | 0         | 0         | 0         | 0         | 0         | 0         | 0         | 0         |
|                | 1         | 0         | 0         | 0         | 0         | 0         | 0         | 0         | 0         | 0         |
|                | 0         | 0         | 0         | 0         | 0         | 1         | 1         | 0         | 0         | 0         |
|                | 0         | 0         | 0         | 0         | 0         | 1         | 0         | 0         | 0         | 0         |
| CAL            | 4         | 1         | 2         | 5         | 4         | 3         | 4         | 3         | 6         | 4         |
|                | 2         | 1         | 2         | 3         | 2         | 2         | 3         | 1         | 3         | 2         |
|                | 5         | 4         | 4         | 6         | 4         | 5         | 4         | 6         | 3         | 4         |
|                | 5         | 4         | 5         | 7         | 4         | 5         | 4         | 7         | 3         | 4         |
|                | 2         | 1         | 3         | 4         | 3         | 3         | 3         | 1         | 3         | 2         |
|                | 4         | 1         | 2         | 5         | 4         | 4         | 3         | 4         | 5         | 5         |
| BoP            | 0         | 0         | 1         | 1         | 0         | 0         | 0         | 0         | 0         | 0         |
|                | 0         | 0         | 0         | 0         | 0         | 0         | 0         | 0         | 0         | 0         |
|                | 0         | 0         | 1         | 0         | 1         | 0         | 0         | 1         | 0         | 0         |
|                | 0         | 0         | 0         | 1         | 1         | 0         | 0         | 0         | 0         | 0         |
|                | 0         | 0         | 0         | 0         | 0         | 0         | 0         | 0         | 0         | 0         |
|                | 0         | 0         | 0         | 0         | 0         | 1         | 0         | 0         | 0         | 1         |
| <b>B group</b> | <b>LS</b> | <b>RG</b> | <b>AC</b> | <b>GF</b> | <b>LM</b> | <b>LC</b> | <b>TC</b> | <b>MZ</b> | <b>AD</b> | <b>PI</b> |
| FMPS           | 10        | 13.6      | 13        | 17.2      | 18.5      | 15.3      | 21        | 10        | 17.1      | 16.7      |
| FMBS           | 3         | 11.5      | 9         | 10.4      | 13        | 5.8       | 2         | 14.4      | 7.9       | 9.3       |

|                |           |           |           |           |           |           |           |           |           |           |
|----------------|-----------|-----------|-----------|-----------|-----------|-----------|-----------|-----------|-----------|-----------|
| PPD            | 2         | 4         | 5         | 2         | 8         | 4         | 4         | 6         | 5         | 4         |
|                | 3         | 3         | 4         | 2         | 2         | 3         | 4         | 3         | 3         | 2         |
|                | 4         | 4         | 3         | 4         | 9         | 4         | 5         | 2         | 6         | 4         |
|                | 4         | 4         | 3         | 5         | 8         | 5         | 3         | 2         | 6         | 4         |
|                | 2         | 3         | 3         | 3         | 3         | 3         | 4         | 3         | 3         | 2         |
|                | 2         | 4         | 5         | 2         | 6         | 4         | 2         | 6         | 5         | 4         |
| REC            | 0         | 0         | 0         | 0         | 1         | 0         | 0         | 0         | 3         | 1         |
|                | 0         | 0         | 0         | 1         | 1         | 0         | 0         | 0         | 4         | 1         |
|                | 0         | 1         | 0         | 0         | 1         | 0         | 0         | 0         | 3         | 1         |
|                | 0         | 0         | 0         | 0         | 3         | 0         | 0         | 0         | 1         | 1         |
|                | 0         | 0         | 0         | 0         | 2         | 0         | 0         | 0         | 1         | 1         |
|                | 0         | 0         | 0         | 0         | 1         | 0         | 0         | 0         | 1         | 1         |
| CAL            | 2         | 4         | 5         | 2         | 9         | 4         | 4         | 6         | 8         | 5         |
|                | 3         | 3         | 4         | 3         | 3         | 3         | 4         | 3         | 7         | 3         |
|                | 4         | 5         | 3         | 4         | 10        | 4         | 5         | 2         | 9         | 5         |
|                | 4         | 4         | 3         | 5         | 11        | 5         | 3         | 2         | 7         | 5         |
|                | 2         | 3         | 3         | 3         | 5         | 3         | 4         | 3         | 4         | 3         |
|                | 2         | 4         | 5         | 2         | 7         | 4         | 2         | 6         | 6         | 5         |
| BoP            | 0         | 0         | 0         | 0         | 1         | 0         | 0         | 1         | 0         | 0         |
|                | 0         | 0         | 0         | 0         | 0         | 0         | 0         | 0         | 0         | 0         |
|                | 0         | 0         | 0         | 0         | 1         | 0         | 0         | 0         | 0         | 0         |
|                | 0         | 1         | 0         | 0         | 1         | 1         | 0         | 1         | 0         | 0         |
|                | 0         | 0         | 0         | 0         | 0         | 0         | 0         | 1         | 0         | 0         |
|                | 0         | 0         | 0         | 1         | 0         | 0         | 0         | 1         | 0         | 0         |
| <b>C group</b> | <b>AC</b> | <b>AB</b> | <b>IM</b> | <b>MS</b> | <b>TF</b> | <b>FI</b> | <b>ES</b> | <b>CP</b> | <b>LZ</b> | <b>AC</b> |
| FMPS           | 14.1      | 10.8      | 15        | 10.4      | 16.6      | 17.8      | 12        | 17.1      | 13        | 12.5      |
| FMBS           | 10.9      | 10        | 7         | 5.2       | 10        | 13.4      | 12        | 13.5      | 11.1      | 10.9      |
| PPD            | 5         | 4         | 4         | 5         | 5         | 7         | 1         | 8         | 4         | 5         |
|                | 4         | 2         | 2         | 3         | 4         | 6         | 5         | 5         | 2         | 3         |
|                | 9         | 5         | 4         | 4         | 4         | 6         | 8         | 3         | 4         | 5         |
|                | 9         | 5         | 4         | 4         | 5         | 6         | 7         | 7         | 3         | 8         |
|                | 5         | 2         | 2         | 3         | 1         | 5         | 1         | 8         | 2         | 8         |
|                | 5         | 3         | 4         | 4         | 4         | 8         | 2         | 8         | 4         | 7         |
| REC            | 0         | 0         | 0         | 0         | 1         | 0         | 0         | 3         | 0         | 0         |
|                | 0         | 0         | 0         | 3         | 0         | 0         | 0         | 4         | 0         | 0         |
|                | 0         | 0         | 0         | 1         | 0         | 0         | 0         | 4         | 0         | 0         |
|                | 0         | 0         | 0         | 0         | 0         | 0         | 0         | 3         | 0         | 0         |
|                | 0         | 0         | 0         | 0         | 0         | 0         | 0         | 3         | 0         | 0         |
|                | 0         | 0         | 0         | 0         | 0         | 0         | 0         | 3         | 0         | 0         |
| CAL            | 5         | 4         | 4         | 5         | 6         | 7         | 1         | 11        | 4         | 5         |
|                | 4         | 2         | 2         | 6         | 4         | 6         | 5         | 9         | 2         | 3         |
|                | 9         | 5         | 4         | 5         | 4         | 6         | 8         | 7         | 4         | 5         |
|                | 9         | 5         | 4         | 4         | 5         | 6         | 7         | 10        | 3         | 8         |
|                | 5         | 2         | 2         | 3         | 1         | 5         | 1         | 11        | 2         | 8         |
|                | 5         | 3         | 4         | 4         | 4         | 8         | 2         | 11        | 4         | 7         |
| BoP            | 0         | 0         | 1         | 0         | 1         | 1         | 0         | 1         | 0         | 0         |
|                | 0         | 0         | 0         | 0         | 0         | 0         | 1         | 0         | 0         | 0         |
|                | 1         | 1         | 1         | 0         | 1         | 1         | 0         | 0         | 0         | 0         |
|                | 1         | 0         | 1         | 0         | 1         | 1         | 0         | 0         | 0         | 0         |
|                | 0         | 0         | 0         | 0         | 0         | 0         | 0         | 0         | 0         | 0         |
|                | 0         | 0         | 0         | 0         | 1         | 1         | 0         | 1         | 0         | 0         |

FMPS and FMBS are expressed as a %; PPD, REC and CAL are expressed as mm; BoP: presence = 1, absence = 0. PPD, REC, CAL and BoP respective -MB, -B, -DB, -DL, -L and -ML measurements are reported on the 6 consecutive lines (from top to bottom)

**Table S2.** Groups A, B and C indices at 3 months after surgery.

| A Group | CL   | DR   | IA   | AP   | IF   | RG   | GI   | SC   | NM    | GC   |
|---------|------|------|------|------|------|------|------|------|-------|------|
| GFMPs   | 16.3 | 16.6 | 16.3 | 16   | 17.5 | 8.3  | 14.8 | 13.9 | 11.1  | 15.6 |
| FMBS    | 8.7  | 11.1 | 12   | 10   | 15   | 6.7  | 4.6  | 9.3  | 9.3   | 14.1 |
| PPD     | 1    | 1    | 1    | 3    | 1    | 2    | 2    | 2    | 2     | 1    |
|         | 1    | 1    | 1    | 1    | 1    | 1    | 1    | 1    | 1     | 1    |
|         | 1    | 1    | 1    | 3    | 1    | 2    | 2    | 3    | 2     | 1    |
|         | 1    | 1    | 2    | 2    | 2    | 2    | 2    | 3    | 2     | 1    |
|         | 1    | 1    | 1    | 1    | 1    | 1    | 1    | 1    | 2     | 1    |
|         | 1    | 1    | 1    | 3    | 1    | 2    | 1    | 3    | 3     | 1    |
| REC     | 1    | 1    | 1    | 0    | 2    | 2    | 1    | 0    | 1     | 2    |
|         | 1    | 1    | 1    | 0    | 2    | 2    | 2    | 0    | 0     | 2    |
|         | 1    | 1    | 1    | 0    | 2    | 2    | 1    | 0    | 0     | 2    |
|         | 1    | 1    | 2    | 0    | 1    | 1    | 0    | 0    | 0     | 1    |
|         | 1    | 1    | 2    | 0    | 1    | 2    | 1    | 0    | 0     | 1    |
|         | 1    | 1    | 1    | 0    | 1    | 1    | 0    | 0    | 0     | 1    |
| CAL     | 2    | 2    | 2    | 3    | 3    | 4    | 3    | 2    | 3     | 3    |
|         | 2    | 2    | 2    | 1    | 3    | 3    | 3    | 1    | 1     | 3    |
|         | 2    | 2    | 2    | 3    | 3    | 4    | 3    | 3    | 2     | 3    |
|         | 2    | 2    | 4    | 2    | 3    | 3    | 2    | 3    | 2     | 2    |
|         | 2    | 2    | 3    | 1    | 2    | 3    | 2    | 1    | 2     | 2    |
|         | 2    | 2    | 2    | 3    | 2    | 3    | 1    | 3    | 3     | 2    |
| BoP     | 0    | 0    | 0    | 1    | 0    | 0    | 0    | 0    | 0     | 0    |
|         | 0    | 0    | 0    | 0    | 0    | 0    | 0    | 0    | 0     | 0    |
|         | 0    | 0    | 0    | 0    | 0    | 0    | 0    | 0    | 0     | 0    |
|         | 0    | 0    | 0    | 1    | 1    | 0    | 0    | 0    | 0     | 0    |
|         | 0    | 0    | 0    | 0    | 0    | 0    | 0    | 0    | 0     | 0    |
|         | 0    | 0    | 0    | 0    | 0    | 0    | 0    | 0    | 0     | 0    |
| B group | LS   | RG   | AC   | GF   | LM   | LC   | TC   | MZ   | AD    | PI   |
| FMPS    | 11.5 | 13   | 13.3 | 15.3 | 16.3 | 11.1 | 14.3 | 9.6  | 15.7  | 10.2 |
| FMBS    | 5.7  | 10.9 | 8.3  | 9.6  | 11.3 | 9.2  | 7.1  | 11.5 | 10.12 | 8.3  |
| PPD     | 2    | 2    | 3    | 2    | 3    | 2    | 1    | 3    | 2     | 2    |
|         | 1    | 1    | 2    | 1    | 2    | 1    | 1    | 2    | 2     | 1    |
|         | 2    | 2    | 3    | 2    | 3    | 2    | 1    | 1    | 2     | 2    |
|         | 1    | 2    | 2    | 2    | 3    | 2    | 1    | 2    | 2     | 1    |
|         |      | 1    | 2    | 2    | 2    | 1    | 1    | 1    | 2     | 1    |
|         | 2    | 2    | 2    | 2    | 3    | 2    | 1    | 3    | 2     | 1    |
| REC     | 1    | 1    | 1    | 0    | 2    | 0    | 1    | 2    | 1     | 1    |
|         | 1    | 1    | 1    | 1    | 2    | 1    | 1    | 1    | 2     | 2    |
|         | 2    | 2    | 0    | 0    | 2    | 0    | 1    | 0    | 2     | 1    |
|         | 2    | 1    | 0    | 0    | 3    | 0    | 1    | 0    | 1     | 1    |
|         | 1    | 1    | 0    | 0    | 3    | 0    | 1    | 0    | 1     | 2    |
|         | 0    | 1    | 1    | 0    | 2    | 0    | 1    | 0    | 1     | 1    |
| CAL     | 3    | 3    | 4    | 2    | 5    | 2    | 2    | 5    | 3     | 3    |
|         | 2    | 2    | 3    | 2    | 4    | 2    | 2    | 3    | 4     | 3    |
|         | 4    | 4    | 3    | 2    | 5    | 2    | 2    | 1    | 4     | 3    |
|         | 3    | 3    | 2    | 2    | 6    | 2    | 2    | 2    | 3     | 2    |
|         | 2    | 2    | 2    | 2    | 5    | 1    | 2    | 1    | 3     | 3    |
|         | 2    | 3    | 3    | 2    | 5    | 2    | 2    | 3    | 3     | 2    |

|                |           |           |           |           |           |           |           |           |           |           |
|----------------|-----------|-----------|-----------|-----------|-----------|-----------|-----------|-----------|-----------|-----------|
| BoP            | 0         | 0         | 0         | 0         | 0         | 0         | 0         | 0         | 0         | 0         |
|                | 0         | 0         | 0         | 0         | 0         | 0         | 0         | 0         | 0         | 0         |
|                | 0         | 0         | 0         | 0         | 0         | 0         | 0         | 0         | 0         | 0         |
|                | 0         | 0         | 0         | 0         | 0         | 0         | 0         | 0         | 0         | 0         |
|                | 0         | 0         | 0         | 0         | 0         | 0         | 0         | 0         | 0         | 0         |
|                | 0         | 0         | 0         | 0         | 0         | 0         | 0         | 0         | 0         | 0         |
| <b>C group</b> | <b>AC</b> | <b>AB</b> | <b>IM</b> | <b>MS</b> | <b>TF</b> | <b>FI</b> | <b>ES</b> | <b>CP</b> | <b>LZ</b> | <b>AC</b> |
| FMPS           | 12.5      | 11.4      | 16.6      | 10        | 13        | 12.5      | 14.2      | 18.7      | 16.1      | 17.2      |
| FMBS           | 9.2       | 7.8       | 7.5       | 6.2       | 9.3       | 8.9       | 9.5       | 15.5      | 12.5      | 12.5      |
| PPD            | 2         | 2         | 2         | 2         | 2         | 2         | 1         | 3         | 2         | 2         |
|                | 2         | 1         | 1         | 1         | 2         | 1         | 3         | 3         | 1         | 1         |
|                | 3         | 2         | 2         | 2         | 2         | 2         | 3         | 3         | 3         | 1         |
|                | 3         | 2         | 2         | 2         | 3         | 3         | 2         | 3         | 2         | 1         |
|                | 2         | 1         | 2         | 2         | 2         | 1         | 1         | 3         | 1         | 1         |
|                | 2         | 2         | 2         | 2         | 2         | 3         | 2         | 3         | 1         | 2         |
| REC            | 1         | 1         | 1         | 1         | 0         | 0         | 0         | 4         | 0         | 0         |
|                | 1         | 1         | 0         | 3         | 0         | 1         | 1         | 4         | 0         | 0         |
|                | 1         | 1         | 1         | 2         | 0         | 0         | 1         | 4         | 0         | 0         |
|                | 0         | 0         | 0         | 0         | 0         | 0         | 0         | 4         | 0         | 3         |
|                | 1         | 1         | 0         | 0         | 0         | 0         | 0         | 4         | 0         | 3         |
|                | 1         | 0         | 0         | 0         | 0         | 1         | 0         | 4         | 0         | 2         |
| CAL            | 3         | 3         | 3         | 3         | 2         | 2         | 1         | 7         | 2         | 2         |
|                | 3         | 2         | 1         | 4         | 2         | 2         | 4         | 7         | 1         | 1         |
|                | 4         | 3         | 3         | 4         | 2         | 2         | 4         | 7         | 3         | 1         |
|                | 3         | 2         | 2         | 2         | 3         | 3         | 2         | 7         | 2         | 4         |
|                | 3         | 2         | 2         | 2         | 2         | 1         | 1         | 7         | 1         | 4         |
|                | 3         | 2         | 2         | 2         | 2         | 4         | 2         | 7         | 1         | 4         |
| BoP            | 0         | 0         | 0         | 0         | 0         | 0         | 0         | 1         | 0         | 0         |
|                | 0         | 0         | 0         | 0         | 0         | 0         | 0         | 0         | 0         | 0         |
|                | 0         | 0         | 0         | 0         | 0         | 0         | 0         | 0         | 0         | 0         |
|                | 0         | 1         | 0         | 0         | 0         | 0         | 0         | 0         | 0         | 0         |
|                | 0         | 0         | 1         | 0         | 0         | 0         | 0         | 0         | 0         | 0         |
|                | 0         | 0         | 0         | 0         | 0         | 0         | 0         | 1         | 0         | 1         |

FMPS and FMBS are expressed as a %; PPD, REC and CAL are expressed as mm; BoP: presence = 1, absence = 0. PPD, REC, CAL and BoP respective -MB, -B, -DB, -DL, -L and -ML measurements are reported on the 6 consecutive lines (from top to bottom).

**Table S3.** Groups A, B and C indices at 6 months after surgery.

| <b>A Group</b> | <b>CL</b> | <b>DR</b> | <b>IA</b> | <b>AP</b> | <b>IF</b> | <b>RG</b> | <b>GI</b> | <b>SC</b> | <b>NM</b> | <b>GC</b> |
|----------------|-----------|-----------|-----------|-----------|-----------|-----------|-----------|-----------|-----------|-----------|
| FMPS           | 18.2      | 17.8      | 14.1      | 16.6      | 15        | 13        | 13.9      | 14.8      | 17.6      | 17.2      |
| FMBS           | 3.4       | 7.8       | 10.9      | 12.5      | 15        | 7.4       | 6.4       | 7.4       | 11.1      | 12.5      |
| PPD            | 1         | 1         | 1         | 2         | 1         | 1         | 2         | 2         | 2         | 1         |
|                | 1         | 1         | 1         | 1         | 1         | 1         | 1         | 1         | 1         | 1         |
|                | 1         | 1         | 1         | 3         | 1         | 1         | 1         | 2         | 2         | 1         |
|                | 1         | 1         | 1         | 2         | 2         | 1         | 1         | 2         | 1         | 1         |
|                | 1         | 1         | 1         | 1         | 1         | 1         | 1         | 1         | 1         | 1         |
|                | 1         | 1         | 1         | 3         | 1         | 1         | 1         | 2         | 1         | 1         |
| REC            | 1         | 1         | 0         | 0         | 2         | 2         | 1         | 0         | 1         | 2         |
|                | 1         | 1         | 0         | 0         | 2         | 2         | 2         | 0         | 0         | 2         |
|                | 1         | 1         | 0         | 0         | 2         | 2         | 1         | 0         | 0         | 2         |
|                | 1         | 1         | 1         | 0         | 2         | 2         | 1         | 0         | 0         | 1         |
|                | 1         | 1         | 1         | 0         | 2         | 1         | 1         | 0         | 0         | 1         |
|                | 1         | 1         | 1         | 0         | 2         | 1         | 1         | 0         | 0         | 1         |

|                |           |           |           |           |           |           |           |           |           |           |
|----------------|-----------|-----------|-----------|-----------|-----------|-----------|-----------|-----------|-----------|-----------|
| CAL            | 2         | 2         | 1         | 2         | 3         | 3         | 3         | 2         | 3         | 3         |
|                | 2         | 2         | 1         | 1         | 3         | 3         | 3         | 1         | 1         | 3         |
|                | 2         | 2         | 1         | 3         | 3         | 3         | 2         | 2         | 2         | 3         |
|                | 2         | 2         | 2         | 2         | 4         | 3         | 2         | 2         | 1         | 2         |
|                | 2         | 2         | 2         | 1         | 3         | 2         | 2         | 1         | 1         | 2         |
|                | 2         | 2         | 2         | 3         | 3         | 2         | 2         | 2         | 1         | 2         |
| BoP            | 0         | 0         | 0         | 0         | 0         | 0         | 0         | 0         | 0         | 0         |
|                | 0         | 0         | 0         | 0         | 0         | 0         | 0         | 0         | 0         | 0         |
|                | 0         | 0         | 0         | 0         | 0         | 0         | 0         | 0         | 0         | 0         |
|                | 0         | 0         | 0         | 0         | 0         | 0         | 0         | 0         | 0         | 0         |
|                | 0         | 0         | 0         | 0         | 0         | 0         | 0         | 0         | 0         | 0         |
|                | 0         | 0         | 0         | 0         | 0         | 0         | 0         | 0         | 0         | 0         |
| <b>B group</b> | <b>LS</b> | <b>RG</b> | <b>AC</b> | <b>GF</b> | <b>LM</b> | <b>LC</b> | <b>TC</b> | <b>MZ</b> | <b>AD</b> | <b>PI</b> |
| FMPS           | 16.3      | 12        | 12.5      | 11.5      | 18        | 13.5      | 15.7      | 11.1      | 12.5      | 11.1      |
| FMBS           | 9.3       | 9.8       | 9.2       | 7.7       | 13        | 7.8       | 1         | 6.5       | 10.4      | 10.2      |
| PPD            | 2         | 1         | 2         | 1         | 1         | 1         | 1         | 2         | 2         | 1         |
|                | 1         | 1         | 1         | 1         | 1         | 1         | 1         | 1         | 2         | 1         |
|                | 2         | 2         | 2         | 1         | 2         | 1         | 1         | 1         | 2         | 1         |
|                | 2         | 1         | 2         | 1         | 3         | 1         | 2         | 1         | 2         | 1         |
|                | 1         | 1         | 1         | 1         | 2         | 1         | 1         | 1         | 2         | 1         |
|                | 2         | 1         | 2         | 1         | 3         | 1         | 1         | 1         | 2         | 1         |
| REC            | 0         | 1         | 1         | 0         | 2         | 1         | 1         | 1         | 0         | 1         |
|                | 2         | 2         | 1         | 1         | 2         | 1         | 0         | 0         | 2         | 2         |
|                | 1         | 2         | 0         | 0         | 2         | 1         | 1         | 0         | 1         | 1         |
|                | 2         | 1         | 0         | 0         | 2         | 1         | 2         | 0         | 1         | 1         |
|                | 2         | 1         | 0         | 1         | 2         | 1         | 2         | 0         | 0         | 2         |
|                | 1         | 1         | 1         | 0         | 2         | 1         | 1         | 0         | 0         | 1         |
| CAL            | 2         | 2         | 3         | 1         | 3         | 2         | 2         | 3         | 2         | 2         |
|                | 3         | 3         | 2         | 2         | 3         | 2         | 1         | 1         | 4         | 3         |
|                | 3         | 4         | 2         | 1         | 4         | 2         | 2         | 1         | 3         | 2         |
|                | 4         | 2         | 2         | 1         | 5         | 2         | 4         | 1         | 3         | 2         |
|                | 3         | 2         | 1         | 2         | 4         | 2         | 3         | 1         | 2         | 3         |
|                | 3         | 2         | 3         | 1         | 5         | 2         | 2         | 1         | 2         | 2         |
| BoP            | 0         | 0         | 1         | 0         | 0         | 0         | 0         | 0         | 0         | 0         |
|                | 0         | 0         | 1         | 0         | 0         | 0         | 0         | 0         | 0         | 0         |
|                | 0         | 0         | 1         | 0         | 0         | 0         | 0         | 0         | 1         | 0         |
|                | 0         | 1         | 1         | 0         | 0         | 0         | 0         | 0         | 0         | 0         |
|                | 0         | 0         | 1         | 0         | 0         | 0         | 0         | 0         | 0         | 0         |
|                | 0         | 0         | 1         | 0         | 0         | 0         | 0         | 0         | 0         | 0         |
| <b>C group</b> | <b>AC</b> | <b>AB</b> | <b>IM</b> | <b>MS</b> | <b>TF</b> | <b>FI</b> | <b>ES</b> | <b>CP</b> | <b>LZ</b> | <b>AC</b> |
| FMPS           | 11.7      | 11.9      | 15.2      | 12.5      | 14.8      | 12        | 14.4      | 20        | 12.2      | 15.6      |
| FMBS           | 8.3       | 7.1       | 8         | 8.3       | 6.5       | 5.6       | 9.6       | 18.7      | 10.6      | 10.9      |
| PPD            | 2         | 2         | 2         | 2         | 2         | 2         | 1         | 3         | 2         | 2         |
|                | 1         | 1         | 1         | 1         | 1         | 1         | 2         | 2         | 1         | 1         |
|                | 3         | 2         | 2         | 2         | 2         | 2         | 2         | 3         | 2         | 1         |
|                | 3         | 2         | 2         | 2         | 1         | 2         | 1         | 3         | 1         | 1         |
|                | 1         | 1         | 1         | 1         | 1         | 1         | 1         | 2         | 1         | 1         |
|                | 2         | 2         | 2         | 2         | 1         | 2         | 1         | 3         | 1         | 1         |

|     |   |   |   |   |   |   |   |   |   |   |
|-----|---|---|---|---|---|---|---|---|---|---|
| REC | 1 | 1 | 1 | 1 | 0 | 0 | 0 | 4 | 0 | 0 |
|     | 1 | 1 | 0 | 3 | 0 | 1 | 1 | 4 | 0 | 0 |
|     | 1 | 1 | 1 | 2 | 0 | 0 | 1 | 4 | 0 | 0 |
|     | 0 | 0 | 0 | 0 | 0 | 0 | 0 | 4 | 0 | 3 |
|     | 1 | 1 | 0 | 0 | 0 | 0 | 0 | 4 | 0 | 3 |
|     | 1 | 0 | 0 | 0 | 0 | 1 | 0 | 4 | 0 | 2 |
| CAL | 3 | 3 | 3 | 3 | 2 | 2 | 1 | 7 | 2 | 2 |
|     | 2 | 2 | 1 | 4 | 1 | 2 | 3 | 6 | 1 | 1 |
|     | 4 | 3 | 3 | 4 | 2 | 2 | 3 | 7 | 2 | 1 |
|     | 3 | 2 | 2 | 2 | 1 | 2 | 1 | 7 | 1 | 4 |
|     | 2 | 2 | 1 | 1 | 1 | 1 | 1 | 6 | 1 | 4 |
|     | 3 | 2 | 2 | 2 | 1 | 3 | 1 | 7 | 1 | 3 |
| BoP | 0 | 0 | 0 | 0 | 0 | 0 | 0 | 1 | 0 | 0 |
|     | 0 | 0 | 0 | 0 | 0 | 0 | 0 | 0 | 0 | 0 |
|     | 0 | 0 | 0 | 0 | 0 | 0 | 0 | 1 | 0 | 0 |
|     | 0 | 0 | 0 | 0 | 0 | 0 | 0 | 0 | 0 | 0 |
|     | 0 | 0 | 0 | 0 | 0 | 0 | 0 | 0 | 0 | 0 |
|     | 0 | 0 | 0 | 0 | 0 | 0 | 0 | 0 | 0 | 0 |

FMPS and FMBS are expressed as a %; PPD, REC and CAL are expressed as mm; BoP: presence = 1, absence = 0. PPD, REC, CAL and BoP respective -MB, -B, -DB, -DL, -L and -ML measurements are reported on the 6 consecutive lines (from top to bottom).
